# Supplementary material for: Automated multilabel diagnosis on electrocardiographic images and signals
Source: PubMed Central journal article supplement (PMC8948243; doi:10.1038/s41467-022-29153-3), 2022-03-24

# ONLINE SUPPLEMENT

Sangha V, Khera R, et al. Automated Multilabel Diagnosis on Electrocardiographic Images and Signals

## TABLE OF CONTENTS

|                                                                                                                                                        |           |
|--------------------------------------------------------------------------------------------------------------------------------------------------------|-----------|
| <b>SUPPLEMENTARY METHODS</b> .....                                                                                                                     | <b>2</b>  |
| <b>Signal Model Parameters</b> .....                                                                                                                   | <b>2</b>  |
| <b>SUPPLEMENTARY TABLES</b> .....                                                                                                                      | <b>3</b>  |
| <b>Supplementary Table 1: Dataset Characteristics</b> .....                                                                                            | <b>3</b>  |
| <b>Supplementary Table 2: Class Balancing Weighting Scheme for Image and Signal-Based Models.</b> .....                                                | <b>4</b>  |
| <b>Supplementary Table 3: Class Weighted Mean Performances of Real-World Model on Subsets of Held-Out Test Set with Noise Effects Introduced</b> ..... | <b>5</b>  |
| <b>Supplementary Table 4: Performance of image model on standard and alternate format images in the held-out test set.</b> .....                       | <b>6</b>  |
| <b>Supplementary Table 5: Performance of image model on standard and alternate format images in the cardiologist-validated test set</b> .....          | <b>7</b>  |
| <b>Supplementary Table 6: Performance of signal models with and without peak morphology inputs on the held-out test set</b> .....                      | <b>8</b>  |
| <b>Supplementary Table 7: Performance of signal models with and without peak morphology inputs on the cardiologist-validated test set</b> .....        | <b>9</b>  |
| <b>SUPPLEMENTARY FIGURES</b> .....                                                                                                                     | <b>10</b> |
| <b>Supplementary Figure 1: Efficientnet-B3 Architecture used for the Image Model, .....</b>                                                            | <b>10</b> |
| <b>Supplementary Figure 2: Custom Inception Architecture used for the Signal Model</b> .....                                                           | <b>11</b> |
| <b>Supplementary Figure 3: Confusion Matrices for Signal Model Predictions.</b> .....                                                                  | <b>12</b> |
| <b>Supplementary Figure 4: Representative Gradient Weighted-Class Activation Maps. .</b>                                                               | <b>13</b> |

## SUPPLEMENTARY METHODS

### Signal Model Parameters

Each convolution was padded so that input and output size was the same and was followed by a batch normalization layer and a Rectified Linear Unit (ReLU) activation layer. Inception blocks were composed of three parallel 1D convolutional blocks with kernels of size 40, 20, and 10, which were concatenated and followed by a pooling layer. The number of channels for the convolutional layers was block dependent and increased further into the model. Batch normalization was used to rescale signals after each convolutional layer, and dropout layers were added to prevent overfitting. The model was trained with an Adagrad optimizer and learning rate of  $5 \times 10^{-3}$  for 10 epochs with a minibatch size of 64. Model weights were randomly initialized with Xavier initialization.

**SUPPLEMENTARY TABLES**

**Supplementary Table 1: Dataset Characteristics**

|                | <b>Cardiologist<br/>Validated Test Set</b> | <b>Held-Out Test<br/>Set</b> | <b>PTBXL</b> | <b>Training +<br/>Validation</b> |
|----------------|--------------------------------------------|------------------------------|--------------|----------------------------------|
| n              | 827                                        | 111412                       | 21785        | 2116824                          |
| Female, n (%)  | 506 (61.2)                                 | 67192 (60.3)                 | 10442 (47.9) | 1276674 (60.3)                   |
| Age, mean (SD) | 54.9 (16.5)                                | 53.5 (17.5)                  | 59.8 (17.0)  | 53.6 (17.4)                      |
| 1dAVb, n (%)   | 28 (3.4)                                   | 1722 (1.5)                   | 793 (3.6)    | 32724 (1.5)                      |
| RBBB, n (%)    | 34 (4.1)                                   | 3031 (2.7)                   | 541 (2.5)    | 58520 (2.8)                      |
| LBBB, n (%)    | 30 (3.6)                                   | 1734 (1.6)                   | 522 (2.4)    | 32943 (1.6)                      |
| SB, n (%)      | 16 (1.9)                                   | 1808 (1.6)                   | 637 (2.9)    | 33633 (1.6)                      |
| AF, n (%)      | 13 (1.6)                                   | 1983 (1.8)                   | 1507 (6.9)   | 37679 (1.8)                      |
| ST, n (%)      | 37 (4.5)                                   | 2425 (2.2)                   | 825 (3.8)    | 45871 (2.2)                      |

**Supplementary Table 2: Class Balancing Weighting Scheme for Image and Signal-Based Models.**

| Label  | Positive Class n (%) | Positive Class Weight | Negative Class Weight |
|--------|----------------------|-----------------------|-----------------------|
| Female | 1276674 (60.3)       | 0.99456179            | 1.00543821            |
| 1dAVb  | 32724 (1.5)          | 1.72679131            | 0.27320869            |
| RBBB   | 58520 (2.8)          | 1.58113966            | 0.41886034            |
| LBBB   | 32943 (1.6)          | 1.72534378            | 0.27465622            |
| SB     | 33633 (1.6)          | 1.72058533            | 0.27941467            |
| AF     | 37679 (1.8)          | 1.69507613            | 0.30492387            |
| ST     | 45871 (2.2)          | 1.64671409            | 0.35328591            |

Abbreviations: 1dAVB - 1st degree AV block, AF – atrial fibrillation, LBBB – left bundle branch block, RBBB – right bundle branch block, SB – sinus bradycardia, ST- sinus tachycardia.

**Supplementary Table 3: Class Weighted Mean Performances of Real-World Model on Subsets of Held-Out Test Set with Noise Effects Introduced**

| <b>Dataset</b>         | <b>Accuracy</b> | <b>PPV</b> | <b>NPV</b> | <b>Specificity</b> | <b>Sensitivity</b> | <b>AUROC</b> | <b>F1</b> | <b>AUPRC</b> |
|------------------------|-----------------|------------|------------|--------------------|--------------------|--------------|-----------|--------------|
| Standardized Subset    | 0.989           | 0.688      | 0.997      | 0.992              | 0.841              | 0.992        | 0.755     | 0.736        |
| Black and White        | 0.989           | 0.687      | 0.997      | 0.992              | 0.847              | 0.992        | 0.756     | 0.732        |
| Rotated                | 0.989           | 0.687      | 0.997      | 0.992              | 0.847              | 0.992        | 0.757     | 0.734        |
| Shifted Starting Point | 0.989           | 0.704      | 0.996      | 0.993              | 0.816              | 0.992        | 0.753     | 0.743        |

AUROC – Area Under Receiver Operator Characteristic Curve, AUPRC – Area Under Precision Recall Curve, PPV – Positive Predictive Value, NPV – Negative Predictive Value.

**Supplementary Table 4: Performance of image model on standard and alternate format images in the held-out test set.**

| Test Image Format | Label         | Accuracy | PPV   | NPV   | Specificity | Sensitivity | AUROC | F1    | AUPRC |
|-------------------|---------------|----------|-------|-------|-------------|-------------|-------|-------|-------|
| <b>Standard</b>   | Male          | 0.865    | 0.817 | 0.898 | 0.875       | 0.849       | 0.934 | 0.833 | 0.905 |
|                   | 1dAVb         | 0.985    | 0.499 | 0.994 | 0.99        | 0.605       | 0.982 | 0.547 | 0.509 |
|                   | RBBB          | 0.989    | 0.75  | 0.997 | 0.992       | 0.878       | 0.994 | 0.809 | 0.801 |
|                   | LBBB          | 0.994    | 0.765 | 0.998 | 0.996       | 0.854       | 0.997 | 0.807 | 0.826 |
|                   | SB            | 0.986    | 0.537 | 0.997 | 0.988       | 0.818       | 0.99  | 0.648 | 0.594 |
|                   | AF            | 0.993    | 0.778 | 0.997 | 0.996       | 0.826       | 0.994 | 0.801 | 0.822 |
|                   | ST            | 0.987    | 0.645 | 0.997 | 0.99        | 0.859       | 0.994 | 0.737 | 0.728 |
|                   | Weighted Mean | 0.989    | 0.672 | 0.997 | 0.992       | 0.817       | 0.992 | 0.735 | 0.725 |
| <b>Alternate</b>  | Male          | 0.862    | 0.819 | 0.891 | 0.878       | 0.836       | 0.931 | 0.827 | 0.901 |
|                   | 1dAVb         | 0.984    | 0.496 | 0.994 | 0.99        | 0.609       | 0.982 | 0.547 | 0.51  |
|                   | RBBB          | 0.988    | 0.735 | 0.997 | 0.991       | 0.882       | 0.994 | 0.802 | 0.797 |
|                   | LBBB          | 0.993    | 0.757 | 0.998 | 0.996       | 0.851       | 0.997 | 0.801 | 0.821 |
|                   | SB            | 0.986    | 0.536 | 0.997 | 0.989       | 0.8         | 0.991 | 0.642 | 0.588 |
|                   | AF            | 0.992    | 0.769 | 0.997 | 0.996       | 0.82        | 0.994 | 0.794 | 0.811 |
|                   | ST            | 0.987    | 0.663 | 0.997 | 0.99        | 0.845       | 0.994 | 0.743 | 0.73  |
|                   | Weighted Mean | 0.988    | 0.669 | 0.997 | 0.992       | 0.812       | 0.992 | 0.732 | 0.721 |

Abbreviations: 1dAVB - 1st degree AV block, AF – atrial fibrillation, AUPRC – Area Under Precision Recall Curve, AUROC – Area Under Receiver Operator Characteristic Curve, LBBB – left bundle branch block, NPV – Negative Predictive Value. PPV – Positive Predictive Value, RBBB – right bundle branch block, SB – sinus bradycardia, ST- sinus tachycardia

**Supplementary Table 5: Performance of image model on standard and alternate format images in the cardiologist-validated test set**

| Test Image Format | Label         | Accuracy | PPV   | NPV   | Specificity | Sensitivity | AUROC | F1    | AUPRC |
|-------------------|---------------|----------|-------|-------|-------------|-------------|-------|-------|-------|
| <b>Standard</b>   | Male          | 0.815    | 0.744 | 0.865 | 0.826       | 0.798       | 0.89  | 0.77  | 0.845 |
|                   | 1dAVb         | 0.985    | 0.711 | 0.999 | 0.986       | 0.964       | 0.995 | 0.818 | 0.866 |
|                   | RBBB          | 0.989    | 0.903 | 0.992 | 0.996       | 0.824       | 0.995 | 0.862 | 0.897 |
|                   | LBBB          | 1        | 1     | 1     | 1           | 1           | 1     | 1     | 1     |
|                   | SB            | 0.995    | 0.8   | 1     | 0.995       | 1           | 0.997 | 0.889 | 0.797 |
|                   | AF            | 0.995    | 0.8   | 0.999 | 0.996       | 0.923       | 0.997 | 0.857 | 0.881 |
|                   | ST            | 0.992    | 0.895 | 0.996 | 0.995       | 0.919       | 0.998 | 0.907 | 0.961 |
|                   | Weighted Mean | 0.992    | 0.867 | 0.997 | 0.995       | 0.93        | 0.997 | 0.893 | 0.915 |
| <b>Alternate</b>  | Male          | 0.839    | 0.801 | 0.862 | 0.877       | 0.779       | 0.897 | 0.79  | 0.842 |
|                   | 1dAVb         | 0.988    | 0.75  | 0.999 | 0.989       | 0.964       | 0.996 | 0.844 | 0.897 |
|                   | RBBB          | 0.993    | 0.938 | 0.995 | 0.997       | 0.882       | 0.993 | 0.909 | 0.859 |
|                   | LBBB          | 0.996    | 0.966 | 0.997 | 0.999       | 0.933       | 1     | 0.949 | 0.99  |
|                   | SB            | 0.99     | 0.667 | 1     | 0.99        | 1           | 0.997 | 0.8   | 0.834 |
|                   | AF            | 0.999    | 0.929 | 1     | 0.999       | 1           | 1     | 0.963 | 0.975 |
|                   | ST            | 0.993    | 0.919 | 0.996 | 0.996       | 0.919       | 0.998 | 0.919 | 0.963 |
|                   | Weighted Mean | 0.993    | 0.877 | 0.997 | 0.995       | 0.937       | 0.997 | 0.901 | 0.922 |

Abbreviations: 1dAVB - 1st degree AV block, AF – atrial fibrillation, AUPRC – Area Under Precision Recall Curve, AUROC – Area Under Receiver Operator Characteristic Curve, LBBB – left bundle branch block, NPV – Negative Predictive Value. PPV – Positive Predictive Value, RBBB – right bundle branch block, SB – sinus bradycardia, ST- sinus tachycardia

**Supplementary Table 6: Performance of signal models with and without peak morphology inputs on the held-out test set**

| Model                           | Label         | Accuracy | PPV   | NPV   | Specificity | Sensitivity | AUROC | F1    | AUPRC |
|---------------------------------|---------------|----------|-------|-------|-------------|-------------|-------|-------|-------|
| <b>Signal + Peak Morphology</b> | Male          | 0.704    | 0.594 | 0.829 | 0.641       | 0.8         | 0.803 | 0.682 | 0.737 |
|                                 | 1dAVb         | 0.968    | 0.214 | 0.991 | 0.976       | 0.411       | 0.934 | 0.282 | 0.197 |
|                                 | RBBB          | 0.987    | 0.733 | 0.995 | 0.992       | 0.827       | 0.987 | 0.777 | 0.745 |
|                                 | LBBB          | 0.992    | 0.697 | 0.997 | 0.994       | 0.821       | 0.994 | 0.754 | 0.754 |
|                                 | SB            | 0.986    | 0.561 | 0.996 | 0.99        | 0.767       | 0.99  | 0.648 | 0.589 |
|                                 | AF            | 0.984    | 0.535 | 0.994 | 0.99        | 0.643       | 0.979 | 0.584 | 0.567 |
|                                 | ST            | 0.986    | 0.639 | 0.997 | 0.989       | 0.854       | 0.992 | 0.731 | 0.708 |
|                                 | Weighted Mean | 0.984    | 0.584 | 0.995 | 0.989       | 0.738       | 0.981 | 0.649 | 0.615 |
| <b>Signal</b>                   | Male          | 0.716    | 0.612 | 0.824 | 0.674       | 0.781       | 0.808 | 0.686 | 0.743 |
|                                 | 1dAVb         | 0.97     | 0.238 | 0.991 | 0.979       | 0.427       | 0.939 | 0.306 | 0.224 |
|                                 | RBBB          | 0.987    | 0.722 | 0.996 | 0.991       | 0.853       | 0.988 | 0.782 | 0.757 |
|                                 | LBBB          | 0.992    | 0.696 | 0.997 | 0.994       | 0.837       | 0.994 | 0.76  | 0.764 |
|                                 | SB            | 0.987    | 0.571 | 0.996 | 0.991       | 0.762       | 0.991 | 0.653 | 0.599 |
|                                 | AF            | 0.985    | 0.585 | 0.993 | 0.992       | 0.625       | 0.98  | 0.604 | 0.603 |
|                                 | ST            | 0.986    | 0.638 | 0.997 | 0.989       | 0.858       | 0.993 | 0.732 | 0.71  |
|                                 | Weighted Mean | 0.985    | 0.594 | 0.995 | 0.99        | 0.745       | 0.982 | 0.659 | 0.63  |

Abbreviations: 1dAVB - 1st degree AV block, AF – atrial fibrillation, AUPRC – Area Under Precision Recall Curve, AUROC – Area Under Receiver Operator Characteristic Curve, LBBB – left bundle branch block, NPV – Negative Predictive Value. PPV – Positive Predictive Value, RBBB – right bundle branch block, SB – sinus bradycardia, ST- sinus tachycardia



**Supplementary Table 7: Performance of signal models with and without peak morphology inputs on the cardiologist-validated test set**

| Model                           | Label         | Accuracy | PPV   | NPV   | Specificity | Sensitivity | AUROC | F1    | AUPRC |
|---------------------------------|---------------|----------|-------|-------|-------------|-------------|-------|-------|-------|
| <b>Signal + Peak Morphology</b> | Male          | 0.712    | 0.594 | 0.847 | 0.646       | 0.816       | 0.795 | 0.688 | 0.703 |
|                                 | 1dAVb         | 0.97     | 0.538 | 0.991 | 0.977       | 0.75        | 0.97  | 0.627 | 0.607 |
|                                 | RBBB          | 0.99     | 0.842 | 0.997 | 0.992       | 0.941       | 0.994 | 0.889 | 0.881 |
|                                 | LBBB          | 0.996    | 0.966 | 0.997 | 0.999       | 0.933       | 0.997 | 0.949 | 0.967 |
|                                 | SB            | 0.989    | 0.667 | 0.998 | 0.991       | 0.875       | 0.996 | 0.757 | 0.814 |
|                                 | AF            | 0.99     | 0.667 | 0.996 | 0.994       | 0.769       | 0.986 | 0.714 | 0.746 |
|                                 | ST            | 0.994    | 0.944 | 0.996 | 0.997       | 0.919       | 0.998 | 0.932 | 0.952 |
|                                 | Weighted Mean | 0.988    | 0.803 | 0.996 | 0.992       | 0.88        | 0.991 | 0.836 | 0.848 |
| <b>Signal</b>                   | Male          | 0.713    | 0.597 | 0.841 | 0.656       | 0.804       | 0.803 | 0.685 | 0.711 |
|                                 | 1dAVb         | 0.971    | 0.577 | 0.984 | 0.986       | 0.536       | 0.96  | 0.556 | 0.501 |
|                                 | RBBB          | 0.99     | 0.882 | 0.995 | 0.995       | 0.882       | 0.997 | 0.882 | 0.928 |
|                                 | LBBB          | 0.995    | 1     | 0.995 | 1           | 0.867       | 0.998 | 0.929 | 0.97  |
|                                 | SB            | 0.989    | 0.667 | 0.998 | 0.991       | 0.875       | 0.995 | 0.757 | 0.686 |
|                                 | AF            | 0.994    | 1     | 0.994 | 1           | 0.615       | 0.993 | 0.762 | 0.802 |
|                                 | ST            | 0.993    | 0.878 | 0.999 | 0.994       | 0.973       | 0.998 | 0.923 | 0.923 |
|                                 | Weighted Mean | 0.989    | 0.837 | 0.994 | 0.994       | 0.816       | 0.99  | 0.82  | 0.824 |

Abbreviations: 1dAVB - 1st degree AV block, AF – atrial fibrillation, AUPRC – Area Under Precision Recall Curve, AUROC – Area Under Receiver Operator Characteristic Curve, LBBB – left bundle branch block, NPV – Negative Predictive Value. PPV – Positive Predictive Value, RBBB – right bundle branch block, SB – sinus bradycardia, ST- sinus tachycardia

## SUPPLEMENTARY FIGURES

Supplementary Figure 1: Efficientnet-B3 Architecture used for the Image Model,

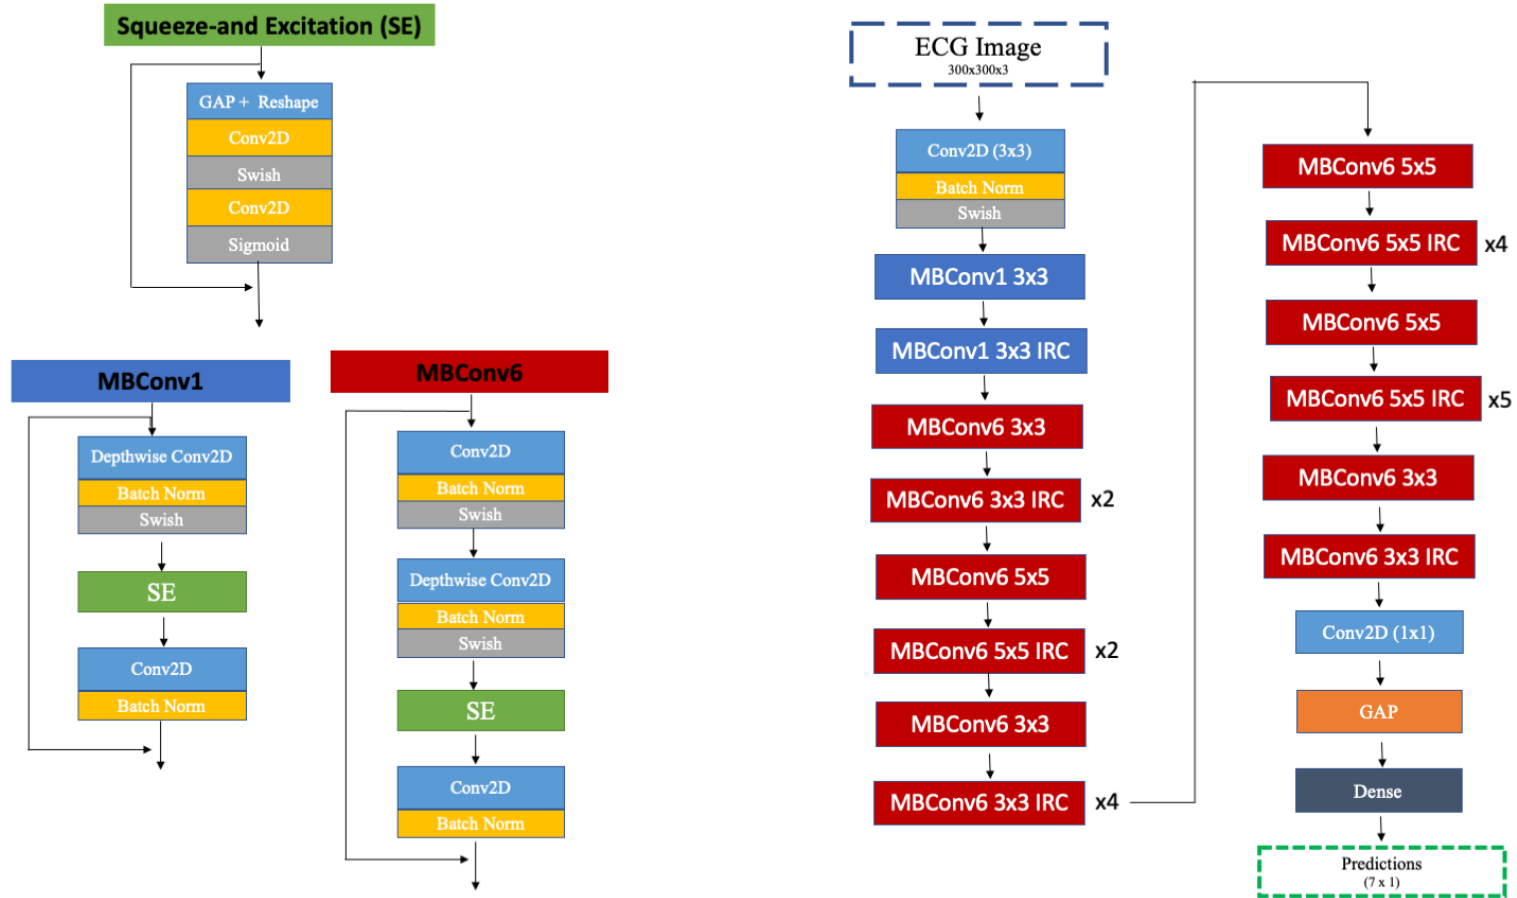

Supplementary Figure 2: Custom Inception Architecture used for the Signal Model.

### 1D Convolution

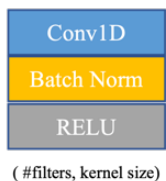

### Inception Block

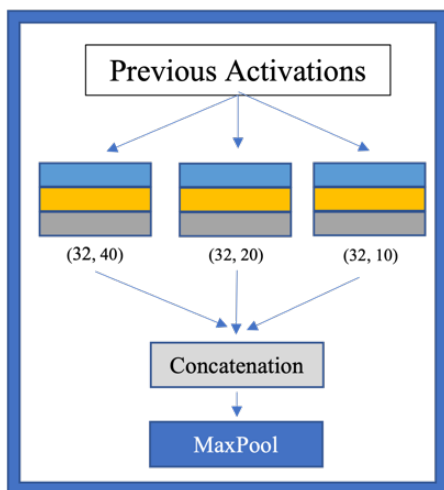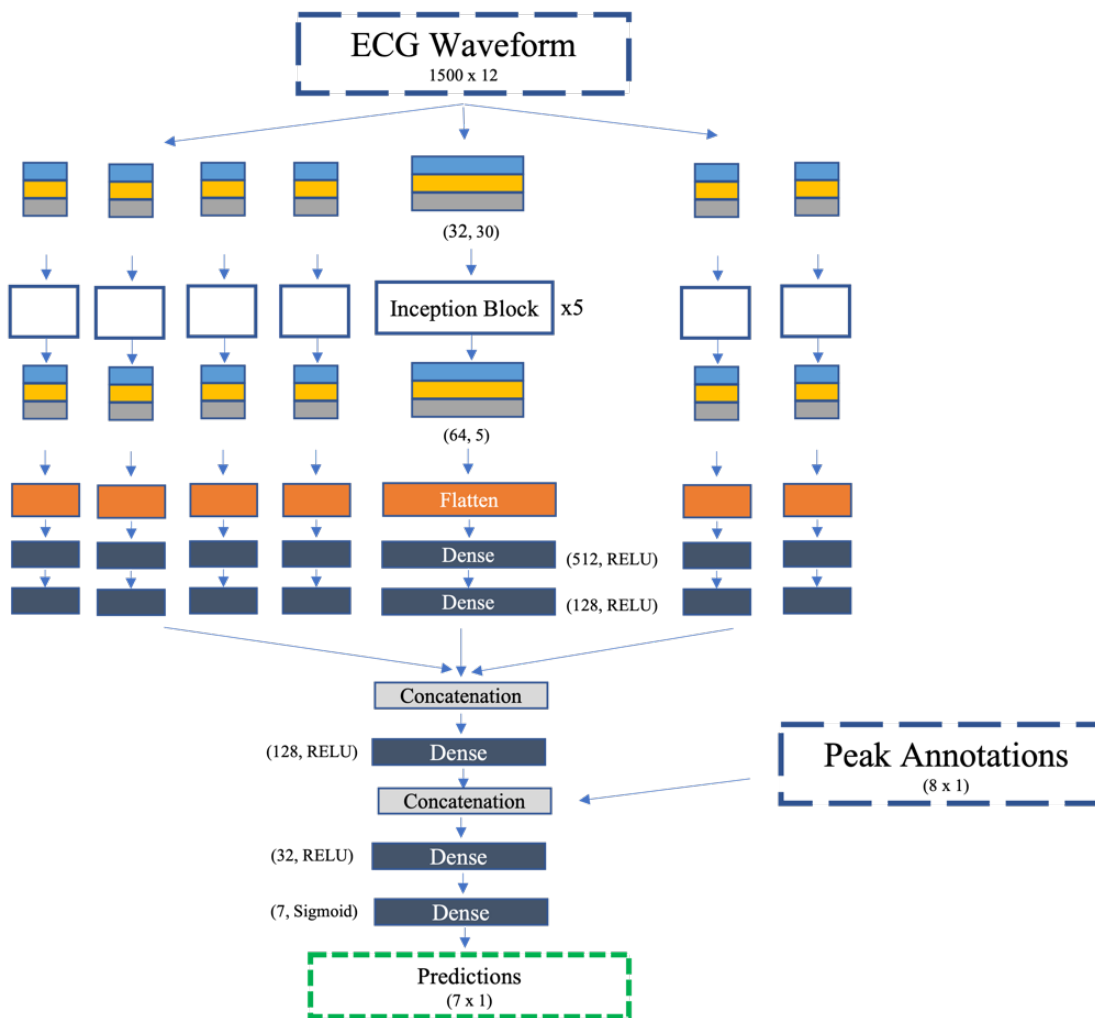

### Supplementary Figure 3: Confusion Matrices for Signal Model Predictions.

Abbreviations: 1dAVB - 1st degree AV block, AF – atrial fibrillation, LBBB – left bundle branch block, RBBB – right bundle branch block, SB – sinus bradycardia, ST- sinus tachycardia.

A. Held-out Test Set

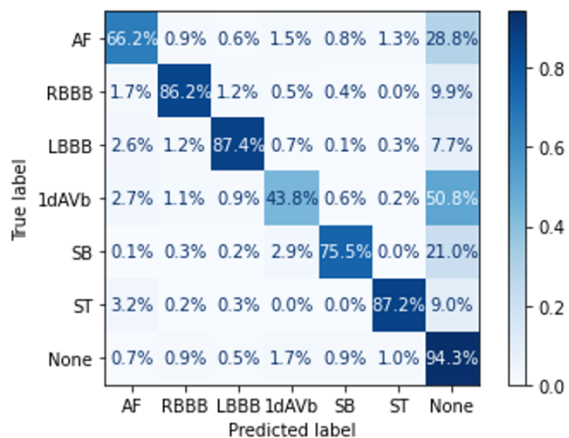

B. Cardiologist-Validated Test Set

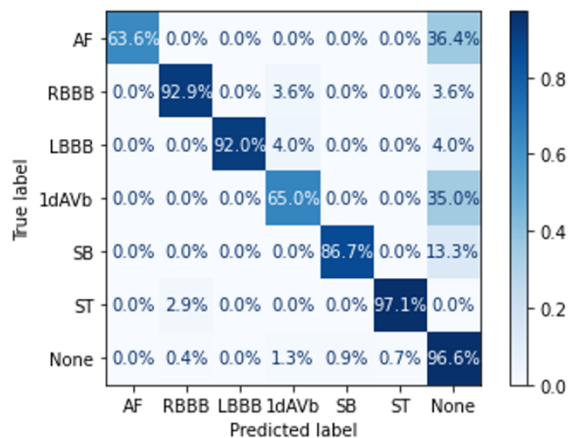

C. PTB-XL

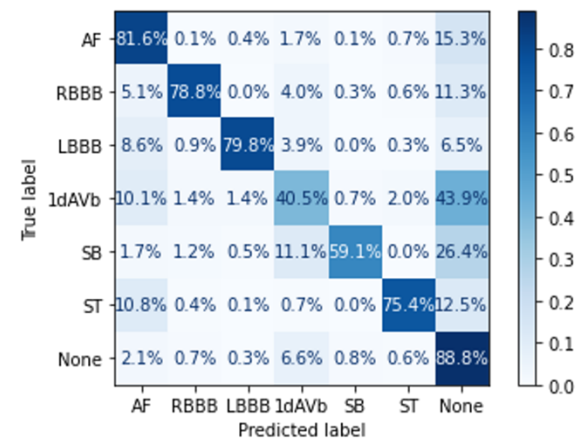

**Supplementary Figure 4: Representative Gradient Weighted-Class Activation Maps.**

Abbreviations: LBBB – left bundle branch block, RBBB – right bundle branch block.

**A. RBBB**

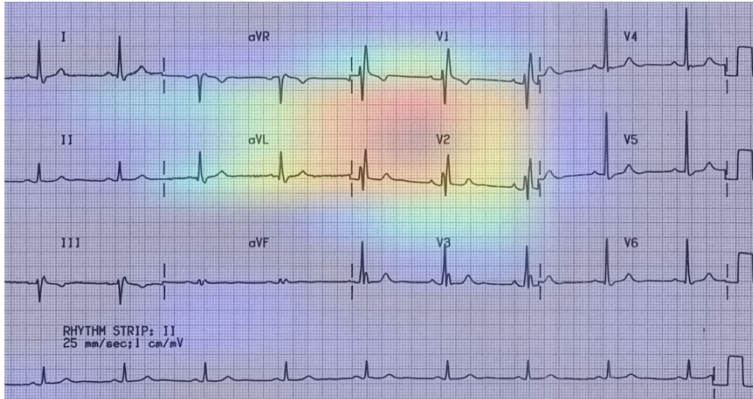

**B. RBBB**

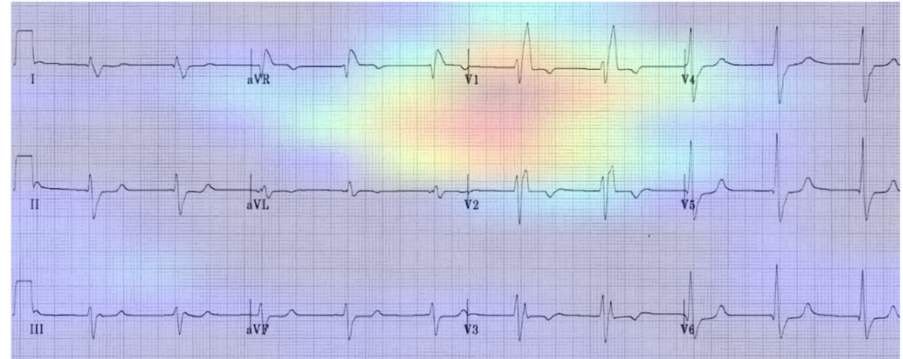

**C. LBBB**

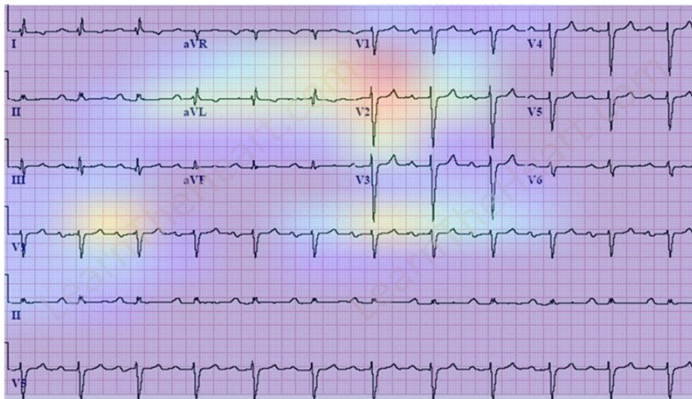

**D. LBBB**

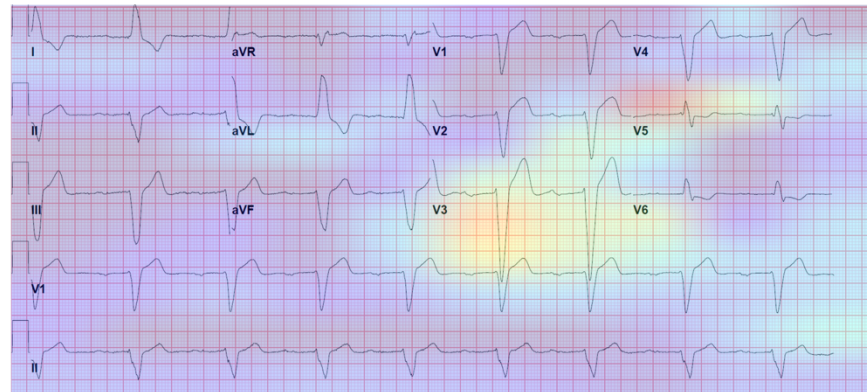

Supplement: 41467_2022_29153_MOESM1_ESM.pdf [file 41467_2022_29153_MOESM1_ESM.pdf]
